# Supplementary material for: Different features of Vδ2 T and NK cells in fatal and non-fatal human Ebola infections
Source: PubMed Central journal article supplement (PMC5472323; doi:10.1371/journal.pntd.0005645), 2017-05-30
Supplement: pntd.0005645.s001.pdf [file pntd.0005645.s001.pdf]

# Gating strategy

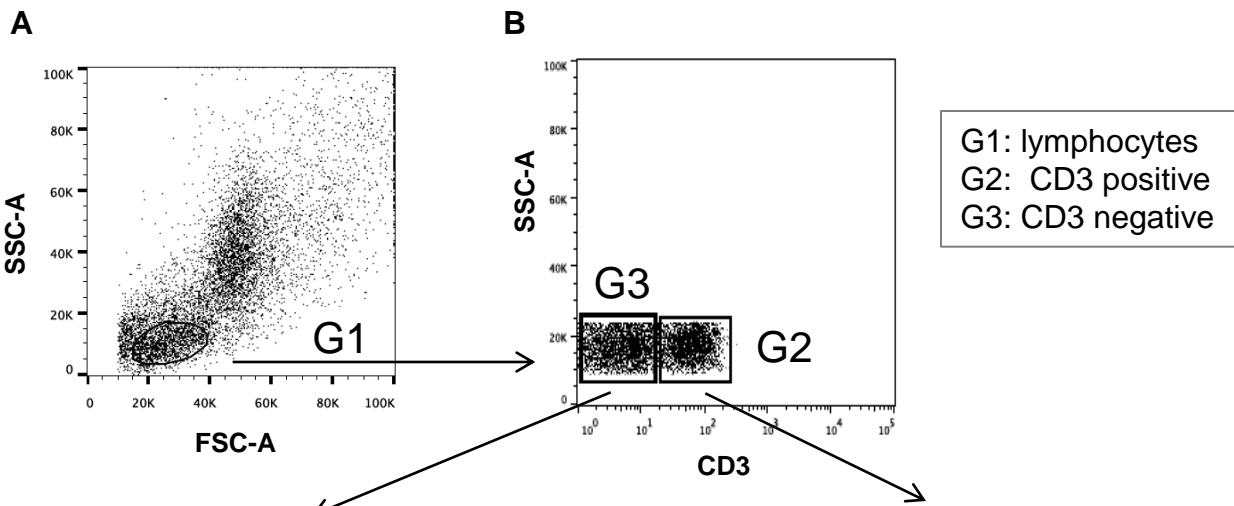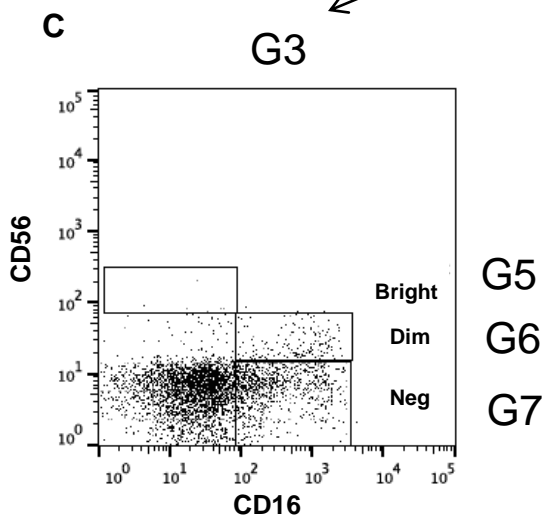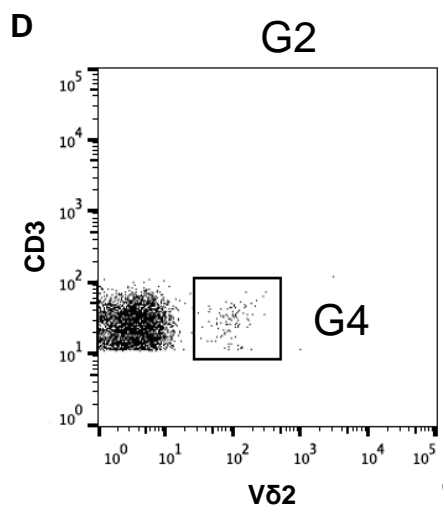

G5: CD56 bright among CD3 neg  
G6: CD56 dim among CD3 neg  
G7: CD56 neg among CD3 neg

G4: Vδ2+ among CD3 T cells

## E G4: Vδ2+/CD3+

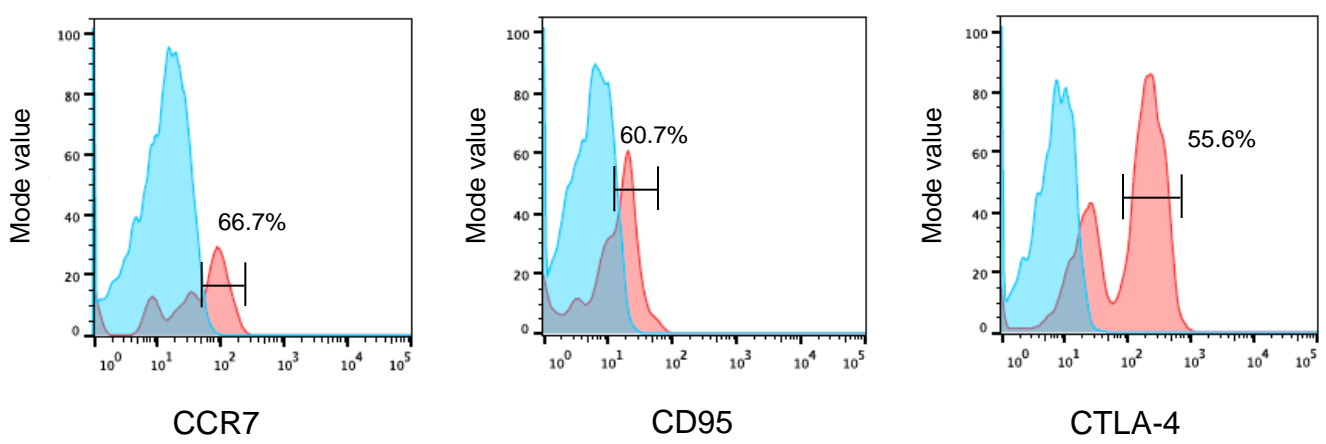

## G6: CD56<sup>Dim</sup>

F

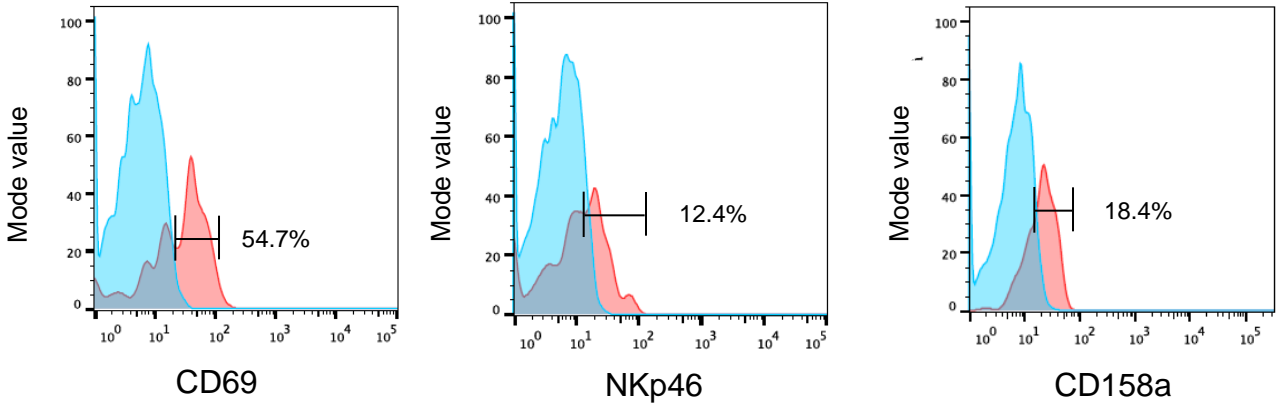

## G7: CD56<sup>neg</sup>

G

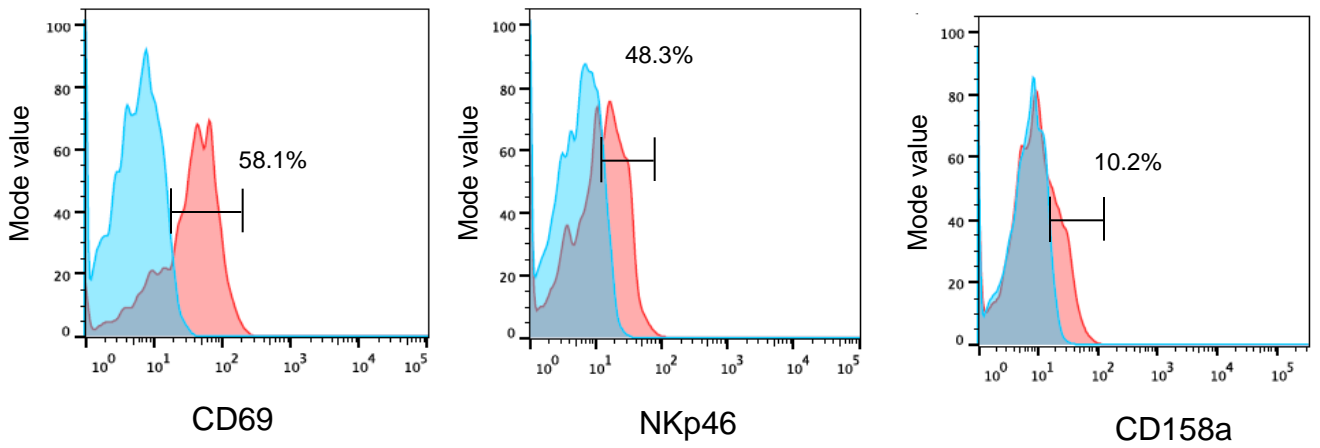

**Supplementary Data Figure 1. Gating strategy.**

The following gates were used for data analysis:

- G1: Lymphocyte gate (Panel A);
- G2:CD3+ cells; G3: CD3- cells (Panel B);
- G4: V $\delta$ 2+ among G2 (Panel D);
- G5: CD56+CD16- NK cells among G3 (bright) ; G6: CD56+CD16+ NK cells among G3 (Dim), G7: CD56-CD16+ NK cells among G3 (Neg) (Panel C).
- The expression of CCR7, CD95 and CTLA4 was analyzed in G4 (Panel E);
- The expression of CD69, NK p46 and CD158a was evaluated in G6 and G7 (Panel F-G)
